# Supplementary material
Source: PubMed Central journal article supplement (PMC6390969)
Supplement: NIHMS1519829-supplement-Supplement1.pdf [file NIHMS1519829-supplement-Supplement1.pdf]

1 **Supplementary Data**

2

3 ***In silico* site-directed mutagenesis informs species-specific predictions of chemical**  
4 **susceptibility derived from the Sequence Alignment to Predict Across Species Susceptibility**  
5 **(SeqAPASS) tool**

6

7 Jon A. Doering <sup>\*†</sup>, Sehan Lee <sup>‡</sup>, Kurt Kristiansen <sup>§</sup>, Linn Evensen <sup>§</sup>, Mace G. Barron <sup>‡</sup>,  
8 Ingebrigt Sylte <sup>§</sup>, Carlie A. LaLone <sup>\*</sup>

9

10 <sup>\*</sup> Mid-Continent Ecology Division, U.S. Environmental Protection Agency, Duluth, MN 55804,  
11 USA

12 <sup>†</sup> National Research Council, U.S. Environmental Protection Agency, Duluth, MN, USA

13 <sup>‡</sup> Gulf Ecology Division, U.S. Environmental Protection Agency, Gulf Breeze, FL, USA

14 <sup>§</sup> Department of Medical Biology, Faculty of Health Sciences, UiT – The Arctic University of  
15 Norway, NO-9037 Tromsø, Norway

16

17 *Corresponding Author:*

18 Carlie A. LaLone  
19 Mid-Continent Ecology Division  
20 U.S. Environmental Protection Agency  
21 6201 Congdon Boulevard  
22 Duluth, Minnesota, 55804, USA  
23 Phone: (218) 529-5038  
24 Fax: (218) 529-5003  
25 E-mail: LaLone.Carlie@epa.gov.

26

27

|    |                                                                                     |          |
|----|-------------------------------------------------------------------------------------|----------|
| 28 | <b>Summary</b>                                                                      |          |
| 29 | Figure S1: Test compounds for organophosphates                                      | page S3  |
| 30 |                                                                                     |          |
| 31 | Figure S2: Test compounds for carbamates                                            | page S4  |
| 32 |                                                                                     |          |
| 33 | Table S1: AChE <i>in silico</i> site-directed mutagenesis docking simulation        | page S5  |
| 34 | validations                                                                         |          |
| 35 |                                                                                     |          |
| 36 | Table S2: AChE <i>in silico</i> site-directed mutagenesis docking simulation        | page S6  |
| 37 | validations continued                                                               |          |
| 38 |                                                                                     |          |
| 39 | Table S3: AChE <i>in silico</i> site-directed mutagenesis docking simulation        | page S7  |
| 40 | results                                                                             |          |
| 41 |                                                                                     |          |
| 42 | Table S4: AChE <i>in silico</i> site-directed mutagenesis docking simulation        | page S8  |
| 43 | results continued                                                                   |          |
| 44 |                                                                                     |          |
| 45 | Table S5: EcR <i>in silico</i> site-directed mutagenesis docking simulation results | page S9  |
| 46 | References                                                                          | page S10 |
| 47 |                                                                                     |          |
| 48 | Supplementary Data File                                                             |          |
| 49 |                                                                                     |          |
| 50 |                                                                                     |          |
| 51 |                                                                                     |          |
| 52 |                                                                                     |          |
| 53 |                                                                                     |          |
| 54 |                                                                                     |          |
| 55 |                                                                                     |          |

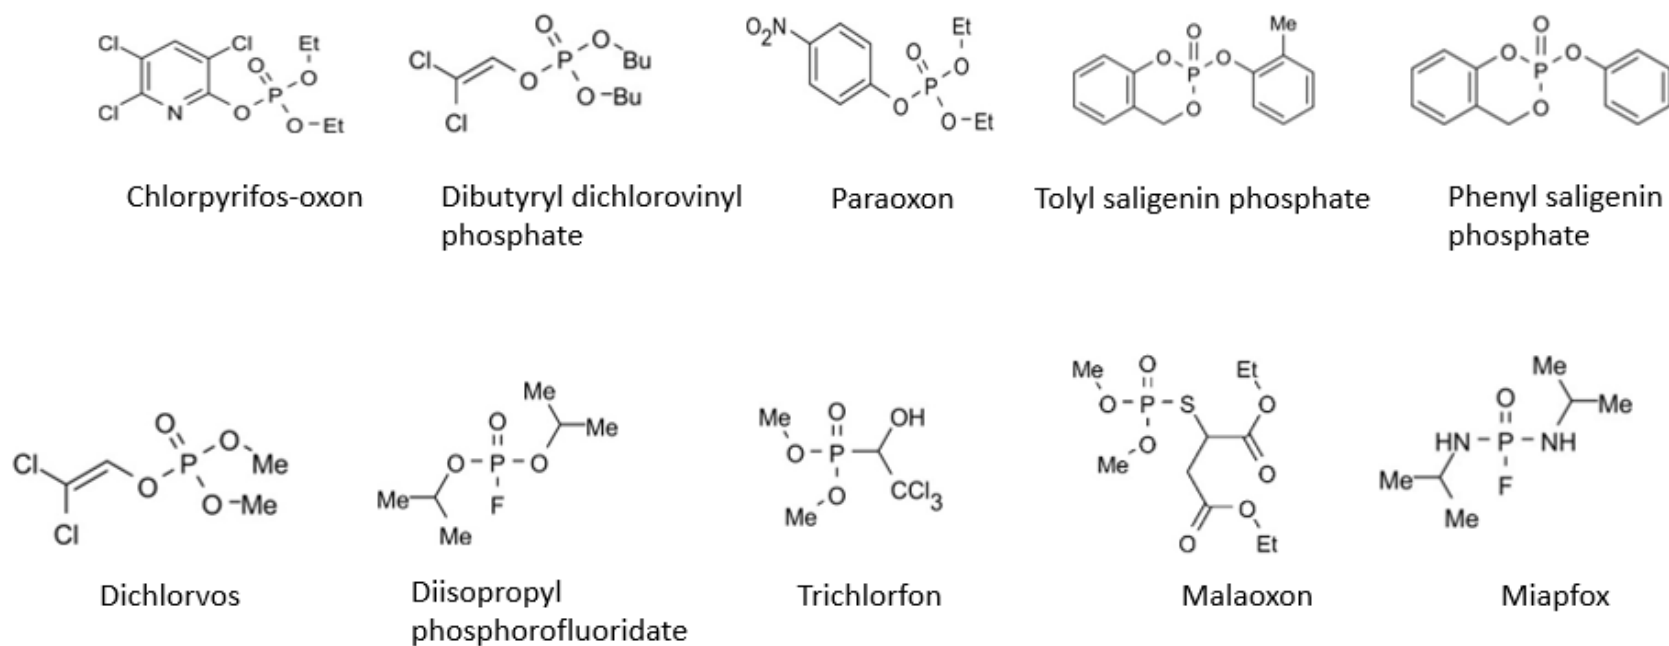

**Figure S1** Test compounds for organophosphates (Lee & Barron 2015).

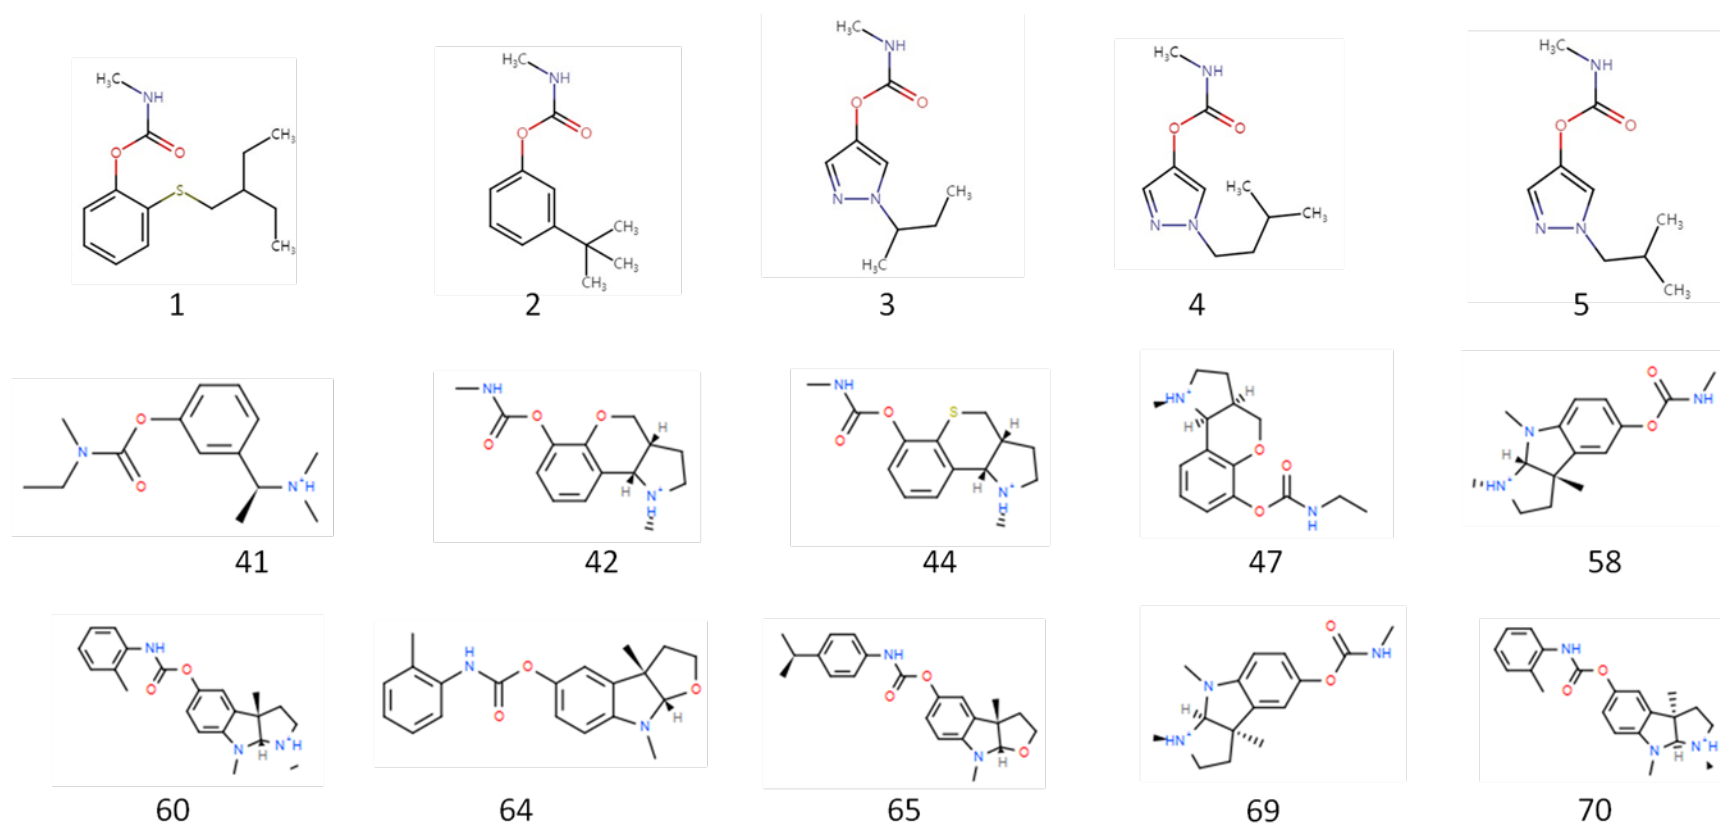

**Figure S2** Test compounds for carbamates (Lee & Barron 2015; Temeyer et al 2014).

**Table S1** AChE *in silico* site-directed mutagenesis docking simulation validations.<sup>a,b,c</sup>

| Compound   | Wild_different species<br>F326 & G153 |                |                       | Wild_Sandfly <sup>d</sup><br>C326 & G153 |                |                       | Mutation<br>C326 & S153 |                |                       |
|------------|---------------------------------------|----------------|-----------------------|------------------------------------------|----------------|-----------------------|-------------------------|----------------|-----------------------|
|            | Exp pIC <sub>50</sub>                 | Classification | Cal pIC <sub>50</sub> | Exp pIC <sub>50</sub>                    | Classification | Cal pIC <sub>50</sub> | Exp pIC <sub>50</sub>   | Classification | Cal pIC <sub>50</sub> |
| Paraoxon   | 8.64                                  | Inhibitor      | 8.98                  | 8.54                                     | Inhibitor      | 7.86                  | 5.42                    | Inhibitor      | 7.86                  |
| Malaoxon   | 8.01                                  | Inhibitor      | 8.41                  | 8.36                                     | Inhibitor      | 7.62                  | 5.71                    | Inhibitor      | 5.11                  |
| Eserine    | 7.55                                  | Inhibitor      | 7.24                  | 8.50                                     | Inhibitor      | 7.24                  | 7.07                    | Inhibitor      | 7.24                  |
| Propoxur   | 5.84-6.89                             | Inhibitor      | 7.24                  | 6.66                                     | Inhibitor      | 7.24                  | 2.37                    | Non-inhibitor  | -                     |
| Carbofuran | 7.60                                  | Inhibitor      | 7.24                  | 7.62                                     | Inhibitor      | 7.24                  | 3.91                    | Inhibitor      | 7.24                  |
| 1          | -                                     | -              | -                     | 7.85                                     | Inhibitor      | 7.24                  | 3.63                    | Non-inhibitor  | -                     |
| 2          | -                                     | -              | -                     | 7.44                                     | Inhibitor      | 7.24                  | 3.91                    | Non-inhibitor  | -                     |
| 3          | -                                     | -              | -                     | 7.89                                     | Inhibitor      | 7.07                  | 6.63                    | Inhibitor      | 6.45                  |
| 4          | -                                     | -              | -                     | 7.13                                     | Inhibitor      | 7.24                  | 5.32                    | Inhibitor      | 5.12                  |
| 5          | -                                     | -              | -                     | 7.12                                     | Inhibitor      | 7.24                  | 5.67                    | Inhibitor      | 5.12                  |

<sup>a</sup> Amino acids represented by acronyms is listed in Table 1.

<sup>b</sup> Acronyms: experimental (Exp), calculated (Cal), 50 % inhibition concentration (IC<sub>50</sub>), -log of the IC<sub>50</sub> (pIC<sub>50</sub>).

<sup>c</sup> Exp pIC<sub>50</sub> values published previously (Temeyer et al 2014).

<sup>d</sup> Sandfly (*Phlebotomus papatasi*).

**Table S2** AChE *in silico* site-directed mutagenesis docking simulation validations continued.<sup>a,b,c</sup>

| Compound   | pIC <sub>50</sub>     |          |           |
|------------|-----------------------|----------|-----------|
|            | Exp_wild <sup>d</sup> | Cal_wild | Cal_F326Y |
| Paraoxon   | 8.54                  | 8.980    | 8.189     |
| Carbofuran | 7.62                  | 7.865    | 7.074     |
| Propoxur   | 6.66                  | 7.241    | 6.450     |

<sup>a</sup> Amino acids represented by acronyms is listed in Table 1.

<sup>b</sup> Acronyms: experimental (Exp), calculated (Cal), -log of the 50 % inhibition concentration (pIC<sub>50</sub>).

<sup>c</sup> Exp pIC<sub>50</sub> values published previously (Temeyer et al 2014).

<sup>d</sup> AChE from *Phlebotomus papatasi* (Temeyer et al 2014).

**Table S3** AChE *in silico* site-directed mutagenesis docking simulation results.<sup>a,b</sup>

| Compound                        | pIC <sub>50</sub>      |      |       |       |                                          |      |      |
|---------------------------------|------------------------|------|-------|-------|------------------------------------------|------|------|
|                                 | Experimental<br>(wild) | wild | W117Y | W117A | Predicted<br>G152A      A235S      W317A |      |      |
| Carbamate 41                    | 5.52                   | 7.24 | 6.45  | 6.45  | 7.07                                     | 7.07 | 7.07 |
| Carbamate 42                    | 7.50                   | 7.24 | 7.29  | 7.29  | 7.24                                     | 7.24 | 7.24 |
| Carbamate 44                    | 8.09                   | 7.86 | 8.08  | 8.08  | 7.24                                     | 7.24 | 7.24 |
| Carbamate 47                    | 6.38                   | 6.45 | 6.45  | 6.45  | 7.28                                     | 6.45 | 7.07 |
| Carbamate 58                    | 7.55                   | 7.86 | 7.29  | 7.29  | 7.24                                     | 7.24 | 7.24 |
| Carbamate 60                    | 8.00                   | 7.57 | 7.57  | 7.57  | 4.23                                     | 7.57 | 7.57 |
| Carbamate 64                    | 7.89                   | 7.57 | 7.57  | 7.57  | 5.04                                     | 7.57 | 7.57 |
| Carbamate 65                    | 5.41                   | 5.04 | 5.04  | 5.04  | 4.23                                     | 5.04 | 5.04 |
| Carbamate 69                    | 5.00                   | 5.64 | 8.08  | 8.08  | 7.24                                     | 7.24 | 5.83 |
| Carbamate 70                    | 5.26                   | 5.83 | 7.57  | 7.57  | 5.04                                     | 7.57 | 7.57 |
| Chlorpyrifos-oxon               | 9.47                   | 9.60 | 8.98  | 8.98  | 9.60                                     | 9.60 | 9.60 |
| Dibutyl dichlorovinyl phosphate | 9.03                   | 8.75 | 8.75  | 8.75  | 8.75                                     | 8.75 | 6.23 |
| Paraoxon                        | 8.64                   | 8.98 | 8.98  | 8.98  | 8.89                                     | 8.89 | 8.89 |
| Tolyl saligenin phosphate       | 7.55                   | 7.86 | 6.23  | 6.23  | 6.45                                     | 6.45 | 6.45 |
| Phenyl saligenin phosphate      | 6.59                   | 6.23 | 6.23  | 6.23  | 6.23                                     | 6.23 | 6.23 |
| Dichlorvos                      | 6.46                   | 8.41 | 7.62  | 7.62  | 7.62                                     | 8.41 | 7.62 |
| Diisopropyl phosphorofluoridate | 6.72                   | 5.90 | 7.62  | 7.62  | 5.11                                     | 5.11 | 5.11 |
| Trichlorfon                     | 5.92                   | 5.90 | 5.12  | 5.12  | 5.90                                     | 5.90 | 5.90 |
| Malaoxon                        | 8.01                   | 8.41 | 8.41  | 8.41  | 8.41                                     | 7.62 | 7.62 |
| Miapfox                         | 4.89                   | 5.11 | 7.62  | 7.62  | 6.23                                     | 5.11 | 5.11 |

<sup>a</sup> Amino acids represented by acronyms is listed in Table 1.

<sup>b</sup> Acronym: -log of the 50 % inhibition concentration (pIC<sub>50</sub>).

**Table S4** AChE *in silico* site-directed mutagenesis docking simulation results continued.<sup>a,b</sup>

| Compound                        | pIC <sub>50</sub>      |      |       |       |       |       |       |
|---------------------------------|------------------------|------|-------|-------|-------|-------|-------|
|                                 | Experimental<br>(wild) | wild | F368A | F368W | F369L | F369S | F369W |
| Carbamate 41                    | 5.52                   | 7.24 | 6.45  | 6.84  | 6.45  | 6.45  | 7.07  |
| Carbamate 42                    | 7.50                   | 7.24 | 7.24  | 7.01  | 7.24  | 6.45  | 7.07  |
| Carbamate 44                    | 8.09                   | 7.86 | 7.24  | 7.01  | 7.24  | 7.24  | 7.24  |
| Carbamate 47                    | 6.38                   | 6.45 | 6.45  | 6.22  | 7.07  | 6.45  | 6.45  |
| Carbamate 58                    | 7.55                   | 7.86 | 7.24  | 7.63  | 7.01  | 7.01  | 7.01  |
| Carbamate 60                    | 8.00                   | 7.57 | 7.57  | 6.76  | 6.45  | 6.45  | 4.23  |
| Carbamate 64                    | 7.89                   | 7.57 | 7.57  | 7.34  | 6.45  | 6.45  | 4.23  |
| Carbamate 65                    | 5.41                   | 5.04 | 5.04  | 5.04  | 6.45  | 6.45  | 4.23  |
| Carbamate 69                    | 5.00                   | 5.64 | 7.24  | 5.12  | 6.45  | 6.43  | 6.45  |
| Carbamate 70                    | 5.26                   | 5.83 | 7.57  | 4.76  | 6.45  | 5.04  | 4.23  |
| Chlorpyrifos-oxon               | 9.47                   | 9.60 | 8.98  | 8.89  | 8.48  | 8.89  | 8.48  |
| Dibutyl dichlorovinyl phosphate | 9.03                   | 8.75 | 8.75  | 9.37  | 7.34  | 6.23  | 7.62  |
| Paraoxon                        | 8.64                   | 8.98 | 8.98  | 8.89  | 8.89  | 8.89  | 7.86  |
| Tolyl saligenin phosphate       | 7.55                   | 7.86 | 6.23  | 7.31  | 6.23  | 6.23  | 5.11  |
| Phenyl saligenin phosphate      | 6.59                   | 6.23 | 6.23  | 7.31  | 6.23  | 6.23  | 6.23  |
| Dichlorvos                      | 6.46                   | 8.41 | 5.11  | 7.62  | 6.21  | 7.62  | 7.62  |
| Diisopropyl phosphorofluoridate | 6.72                   | 5.90 | 5.11  | 5.11  | 5.11  | 5.11  | 7.62  |
| Trichlorfon                     | 5.92                   | 5.90 | 5.90  | 5.90  | 5.90  | 6.23  | 5.90  |
| Malaoxon                        | 8.01                   | 8.41 | 7.62  | 8.41  | 6.21  | 5.11  | 7.62  |
| Miapfox                         | 4.89                   | 5.11 | 5.11  | 5.11  | 5.11  | 5.11  | 5.11  |

<sup>a</sup> Amino acids represented by acronyms is listed in Table 1.

<sup>b</sup> Acronym: -log of the 50 % inhibition concentration (pIC<sub>50</sub>).



**Table S5** EcR *in silico* site-directed mutagenesis docking simulation results.<sup>a,b</sup>

| <b>Mutant</b> | <b>Ligand</b> | <b>Relative Score<sup>a</sup></b> |
|---------------|---------------|-----------------------------------|
| D506E         | E20           | 0.7                               |
| D506P         | E20           | 14.2                              |
| T537A         | E20           | 6.1                               |
| A592G         | E20           | 0.3                               |
| A592F         | E20           | 7.3                               |
| A592V         | E20           | 0.9                               |
| N695A         | E20           | 6.3                               |

<sup>a</sup> Amino acids represented by acronyms is listed in Table 1.

<sup>b</sup> Binding free energy of mutant model relative to binding free energy of wild-type model.

## References

Lee, S., Barron, M.G. (2015). Development of a 3D-QSAR model for acetylcholinesterase inhibitors using a combination of fingerprint, molecular docking, and structure-based pharmacophore approaches. *Toxicol. Sci.* **148(1)**, 60-70.

Temeyer, K.B., Tong, F., Totrov, M.M., Tuckow, A.P., Chen, Q., Carlier, P.R., Perez de Leon, A.A., Bloomquist, J.R. (2014). Acetylcholinesterase of the sand fly, *Phlebotomus papatasi* (Scopoli): construction, expression and biochemical properties of the G119S orthologous mutant. *Para. Vectors.* **7**, 577.
